## P4730

**Underweight is associated with unfavourable short- and long-term outcomes after MitraClip therapy: a body mass index derived subgroup analysis of the German Transcatheter Mitral Valve Interventions (**

D. Kalbacher<sup>1</sup>, E.P. Tigges<sup>1</sup>, P. Boekstegers<sup>2</sup>, M. Puls<sup>3</sup>, B. Plicht<sup>4</sup>, H. Eggebrecht<sup>5</sup>, G. Nickenig<sup>6</sup>, R.S. Von Bardeleben<sup>7</sup>, C.S. Zuern<sup>8</sup>, J. Franke<sup>9</sup>, H. Sievert<sup>9</sup>, T. Ouarrak<sup>10</sup>, J. Senges<sup>10</sup>, E. Lubos<sup>1</sup>

<sup>1</sup>University Heart Center Hamburg, Hamburg, Germany; <sup>2</sup>Helios Hospital Siegburg-Bonn, Siegburg, Germany; <sup>3</sup>Georg-August University, Göttingen, Germany; <sup>4</sup>Herzzentrum Westfalen, Cardiology Clinic, Dortmund, Germany; <sup>5</sup>CardioVascular Center Bethanien (CCB), Frankfurt am Main, Germany; <sup>6</sup>University Hospital Bonn, Bonn, Germany; <sup>7</sup>Johannes Gutenberg University Mainz (JGU), Mainz, Germany; <sup>8</sup>Eberhard-Karls University of Tübingen, Tübingen, Germany; <sup>9</sup>CardioVascular Center Frankfurt, Frankfurt am Main, Germany; <sup>10</sup>Stiftung Institut für Herzinfarktforschung, Ludwigshafen, Germany

**Funding Acknowledgement:** The TRAMI registry has been supported by proprietary means of IHF. Additional funding is provided by "Deutsche Herzstiftung" and a grant from Abbott.

**Background:** Underweight and obesity represent classical risk factors for patients undergoing cardiac surgery or interventional treatment. The multicentre German Transcatheter Mitral Valve Interventions (TRAMI) registry comprises a large and prospectively enrolled real-world cohort of patients treated by MitraClip implantation.

**Aims:** The current analysis examines the impact of underweight, overweight and obesity on intra-hospital, short and long-term outcomes in patients treated by MitraClip therapy.

**Methods and results:** From 08/2010 until 07/2013, 799 patients (age 75.3±8.6 years, male gender 60.7%, median logistic EuroSCORE 20% [12; 31], functional mitral regurgitation (MR): 69.3%) were prospectively enrolled into the multicentre, industry-independent German Transcatheter Mitral Valve Interventions registry. Patients were stratified according to body mass index (BMI) into four groups: BMI <20 kg/m<sup>2</sup> (underweight, n=49), BMI 20.0 to <25.0 kg/m<sup>2</sup> (normal weight, n=293), BMI 25.0 to <30.0 kg/m<sup>2</sup> (overweight, n=296) and BMI ≥30 kg/m<sup>2</sup> (obese, n=132). Procedure and radiation time were comparable among all groups. Significant increased

rates of procedural failure (12.2% vs. 2.1 [normal weight], p<0.001), transfusion/bleeding (20.8% vs. normal weight: 5.6%, obesity: 7.0%, p<0.01), sepsis or multiorgan failure and low cardiac output failure were found for underweight patients only. Kaplan-Meier survival curves demonstrated inferior survival for underweight patients, but comparable outcomes for all other patients (global log rank test, p<0.01). Multivariable Cox-regression analysis (adjusted for age, gender, creatinine ≥1.5mg/dl, diabetes, left ventricular ejection fraction <30% and chronic obstructive pulmonary disease) confirmed underweight (as compared to normal weight) as an independent risk factor of death (hazard ratio [HR]: 1.58, 95%-confidence interval (CI): 1.01–2.46, p=0.044) and overweight as protective against death (HR: 0.71; 95%-CI: 0.55–0.93; p=0.011).

**Conclusion:** Underweight patients are exposed to increased rates of procedural failure, bleeding and low cardiac output as well as increased short- and long-term mortality rates when undergoing MitraClip implantation and should therefore be carefully discussed within the heart team.
